# Supplementary material
Source: PubMed Central journal article supplement (PMC3624175)
Supplement: MCB.01548-12_zmb999109950so1.pdf [file MCB.01548-12_zmb999109950so1.pdf]

## SUPPLEMENTAL INFORMATION

### Supplemental Figure 1.

**A)** Mouse *Acot7* mRNA abundance across different brain regions across development. **B)** Western blot images of ACOT7 in brain regions from fed or overnight fasted mice, n=3. **C)** Western blot images of cytosol and total membrane fractions isolated from mouse brain and probed for ACOT7 or VDAC as a membrane protein control, n=3. Data represent average  $\pm$  standard error of the mean.

### Supplemental Figure 2.

Long chain acyl-CoA content in control and *Acot7*<sup>N<sup>-/-</sup></sup> mice fed or overnight fasted in the **A)** hypothalamus, **B)** cortex, and **C)** cerebellum, n=5-7. Data represent average  $\pm$  standard error of the mean. \* indicates  $p \leq 0.05$  by two-tail Student's t-test comparing *Acot7*<sup>N<sup>-/-</sup></sup> to controls.

### Supplemental Figure 3.

**A)** Mitochondrial DNA abundance relative to nuclear DNA in control and *Acot7*<sup>N<sup>-/-</sup></sup> livers, n=5-7. **B)** Brown adipose mRNA abundance in control and *Acot7*<sup>N<sup>-/-</sup></sup> mice overnight fasted and with or without a 6 hour cold exposure, n=5-6. **C)** Hypothalamus mRNA abundance in control and *Acot7*<sup>N<sup>-/-</sup></sup> mice, n=6. Abbreviations: mitochondrial cytochrome *c* oxidase 1 (mtCo), mitochondrial cytochrome *b* (mtCy), mitochondrial NADH dehydrogenase subunit 1 (mtNd1), uncoupling protein 1 (Ucp1), deiodinase 2 (dio2), peroxisome proliferator-activated receptor gamma, coactivator 1 alpha (Pgc1a), Agouti-related protein (AgRP), neuropeptide Y (Npy), cocaine-and-amphetamine-regulated transcript (Cart), and pro-opiomelanocortin (Pomc). Data represent average  $\pm$  standard error of the mean. \* indicates  $p \leq 0.05$  by two-tail Student's t-test comparing *Acot7*<sup>N<sup>-/-</sup></sup> to controls.

### Supplemental Table 1.

Average metabolite values from control and *Acot7*<sup>N<sup>-/-</sup></sup> brains expressed as fold-change relative to controls. P-values indicate values determined by Welch's t-test.

**A**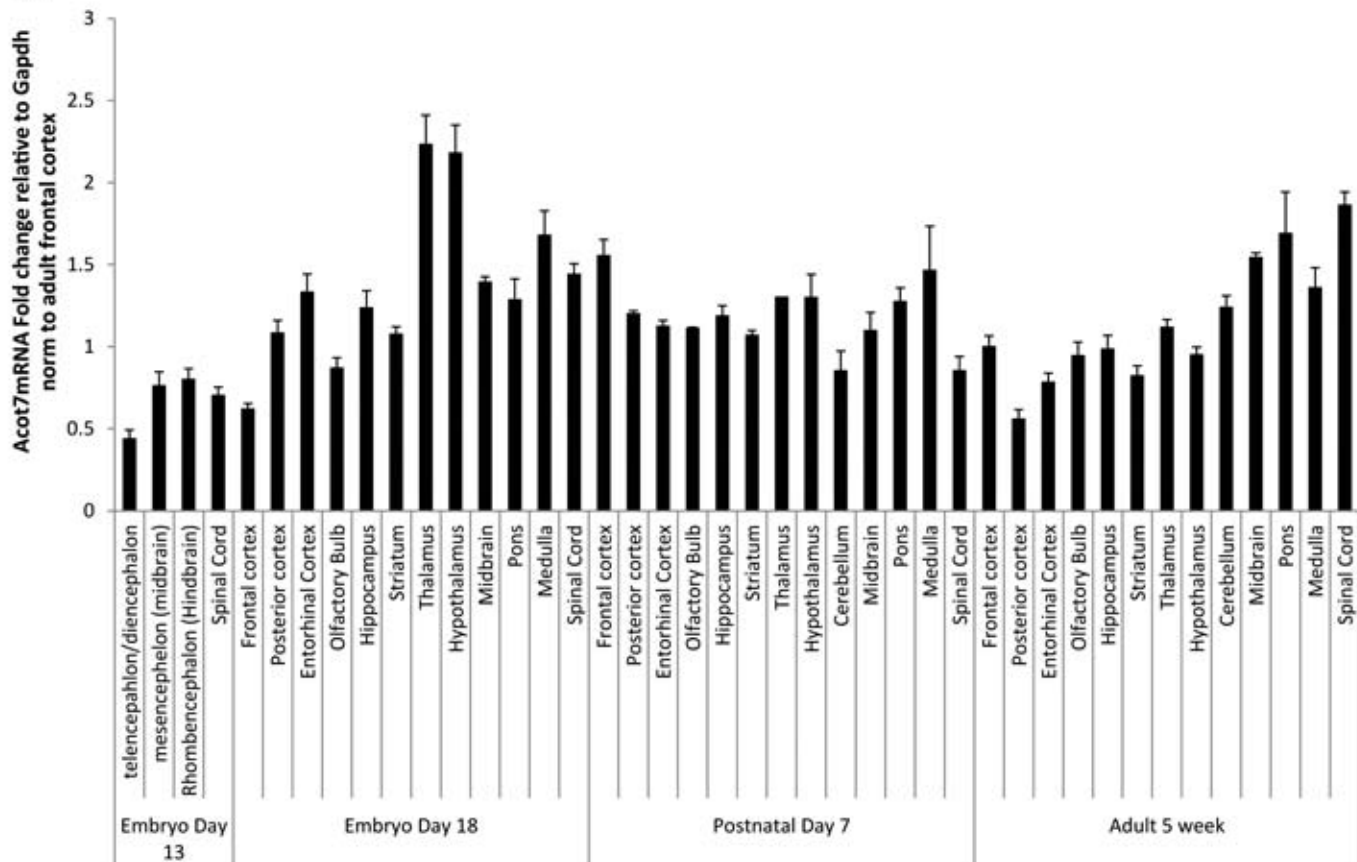**B**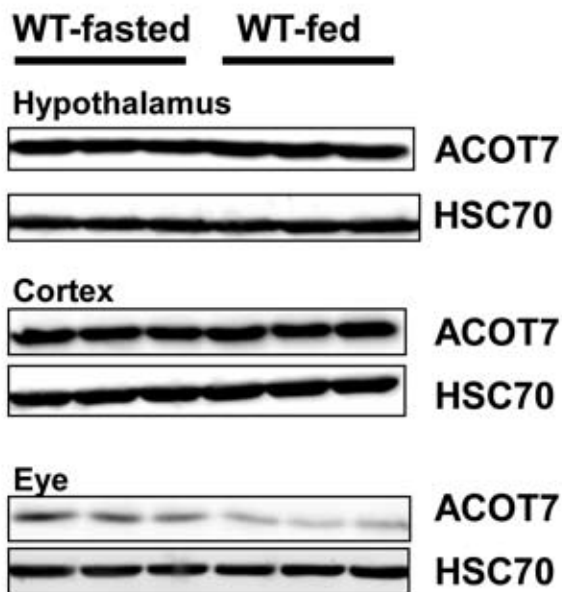**C**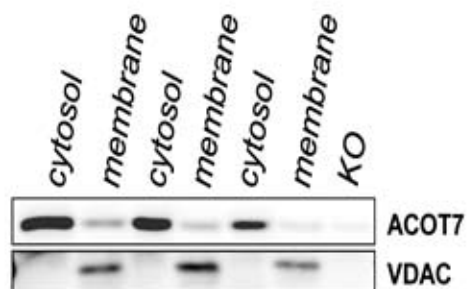

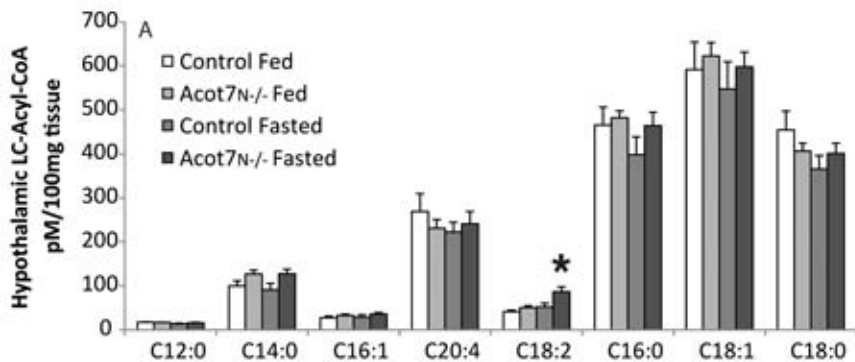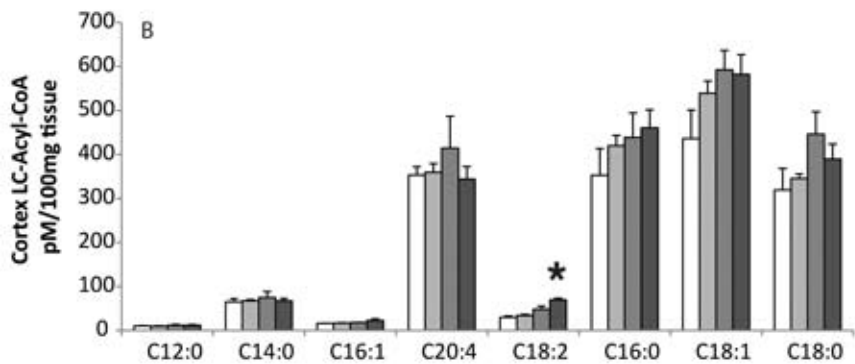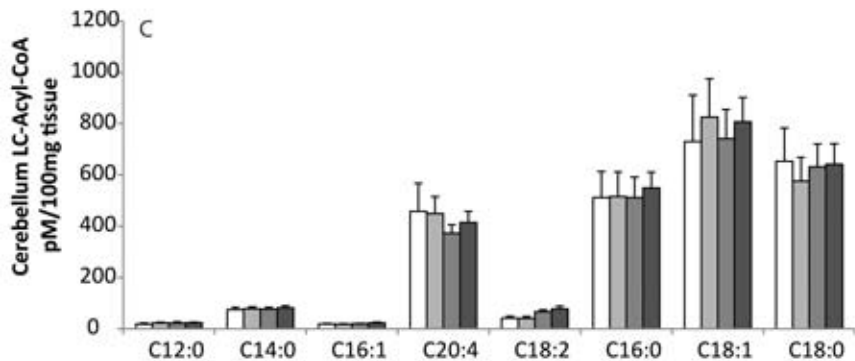

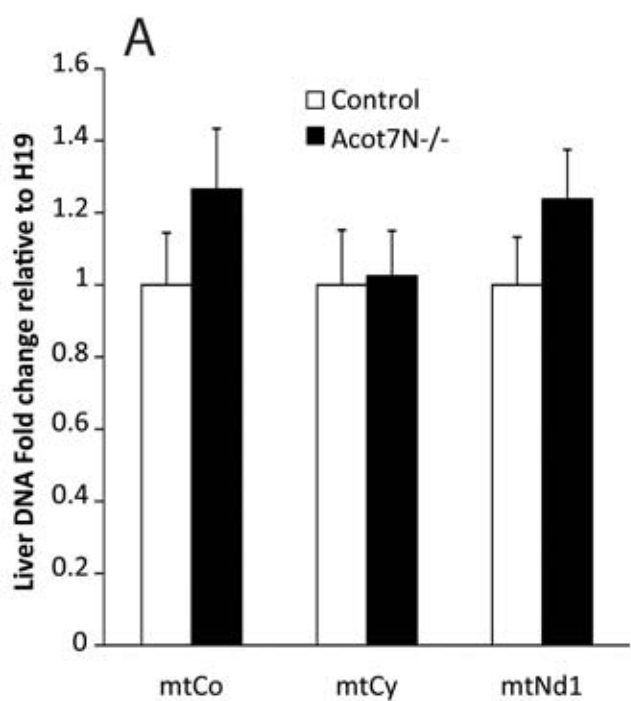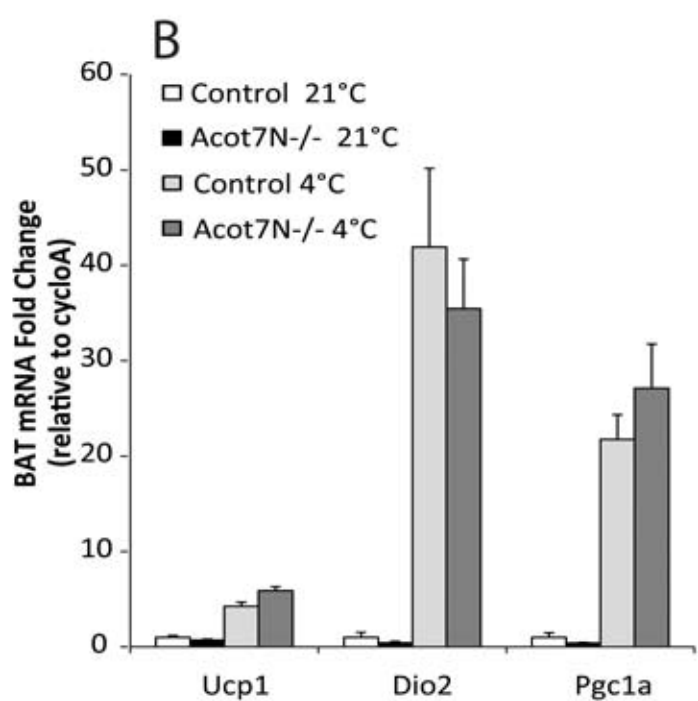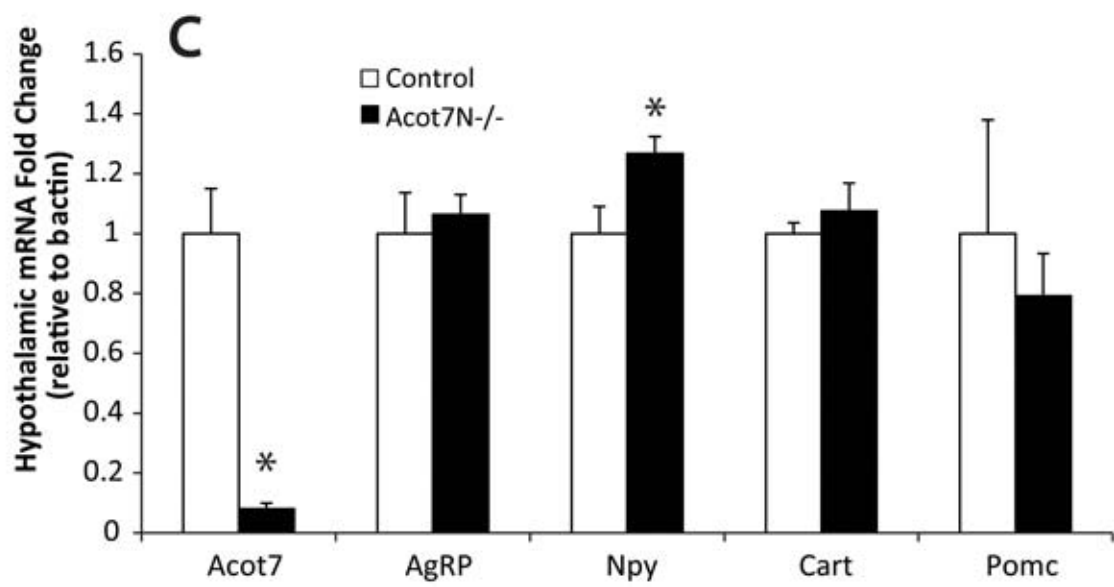

| SUPER PATHWAY                                                    | BIOCHEMICAL NAME                                  | Control AVE | Acet7N-AVE  | p-Value           |
|------------------------------------------------------------------|---------------------------------------------------|-------------|-------------|-------------------|
| Amino acid                                                       | glycine                                           | 1.00        | 1.01        | 0.95              |
|                                                                  | serine                                            | 1.00        | 0.97        | 0.63              |
|                                                                  | N-acetylserine                                    | 1.00        | 1.01        | 0.79              |
|                                                                  | homoserine                                        | 1.00        | 0.89        | 0.11              |
|                                                                  | 3-phosphoserine                                   | 1.00        | 0.94        | 0.54              |
|                                                                  | <b>threonine</b>                                  | 1.00        | 0.89        | <b>0.03</b>       |
|                                                                  | allo-threonine                                    | 1.00        | 0.80        | 0.06              |
|                                                                  | betaine                                           | 1.00        | 0.87        | 0.09              |
|                                                                  | alanine                                           | 1.00        | 0.99        | 0.91              |
|                                                                  | beta-alanine                                      | 1.00        | 1.00        | 0.82              |
|                                                                  | N-acetylalanine                                   | 1.00        | 1.06        | 0.39              |
|                                                                  | aspartate                                         | 1.00        | 0.95        | 0.20              |
|                                                                  | N-acetyl-aspartate (NAA)                          | 1.00        | 0.95        | 0.38              |
|                                                                  | <b>glutamate</b>                                  | 1.00        | 0.86        | <b>0.03</b>       |
|                                                                  | <b>glutamine</b>                                  | 1.00        | 0.92        | <b>0.03</b>       |
|                                                                  | gamma-aminobutyrate (GABA)                        | 1.00        | 0.94        | 0.52              |
|                                                                  | N-acetylglutamate                                 | 1.00        | 0.98        | 0.84              |
|                                                                  | N-acetyl-aspartyl-glutamate (NAAG)                | 1.00        | 1.04        | 0.15              |
|                                                                  | N-acetylglutamine                                 | 1.00        | 0.86        | 0.10              |
|                                                                  | histidine                                         | 1.00        | 0.91        | 0.33              |
|                                                                  | lysine                                            | 1.00        | 1.03        | 0.54              |
|                                                                  | <b>2-aminoadipate</b>                             | 1.00        | 0.74        | <b>0.00</b>       |
|                                                                  | pipecolate                                        | 1.00        | 1.42        | 0.14              |
|                                                                  | <b>glutaryl carnitine</b>                         | 1.00        | 0.67        | <b>0.00</b>       |
|                                                                  | phenylalanine                                     | 1.00        | 1.04        | 0.42              |
|                                                                  | tyrosine                                          | 1.00        | 1.08        | 0.21              |
|                                                                  | 3-(4-hydroxyphenyl)lactate                        | 1.00        | 1.11        | 0.14              |
|                                                                  | tryptophan                                        | 1.00        | 0.98        | 0.68              |
|                                                                  | C-glycosyltryptophan*                             | 1.00        | 1.03        | 0.62              |
|                                                                  | 5-hydroxyindoleacetate                            | 1.00        | 1.02        | 0.87              |
|                                                                  | isoleucine                                        | 1.00        | 1.07        | 0.25              |
|                                                                  | leucine                                           | 1.00        | 1.07        | 0.28              |
|                                                                  | valine                                            | 1.00        | 1.02        | 0.68              |
|                                                                  | alpha-hydroxyisovalerate                          | 1.00        | 1.56        | 0.65              |
|                                                                  | 2-methylbutyrylcarnitine                          | 1.00        | 1.01        | 0.93              |
|                                                                  | isovalerylcarnitine                               | 1.00        | 0.99        | 0.92              |
|                                                                  | hydroxyisovalerylcarnitine                        | 1.00        | 0.92        | 0.20              |
|                                                                  | cysteine                                          | 1.00        | 0.95        | 0.33              |
|                                                                  | cystine                                           | 1.00        | 0.99        | 1.00              |
|                                                                  | taurine                                           | 1.00        | 1.04        | 0.72              |
|                                                                  | S-adenosylhomocysteine (SAH)                      | 1.00        | 0.95        | 0.58              |
|                                                                  | methionine                                        | 1.00        | 1.02        | 0.65              |
|                                                                  | N-acetylmethionine                                | 1.00        | 1.03        | 0.68              |
|                                                                  | 2-hydroxybutyrate (AHB)                           | 1.00        | 0.91        | 0.69              |
|                                                                  | arginine                                          | 1.00        | 1.03        | 0.51              |
|                                                                  | ornithine                                         | 1.00        | 0.95        | 0.50              |
|                                                                  | urea                                              | 1.00        | 1.16        | 0.29              |
|                                                                  | proline                                           | 1.00        | 1.05        | 0.39              |
|                                                                  | <b>N-acetylmethionine</b>                         | 1.00        | 1.79        | <b>0.01</b>       |
|                                                                  | trans-4-hydroxyproline                            | 1.00        | 0.96        | 0.60              |
| argininosuccinate                                                | 1.00                                              | 0.92        | 0.27        |                   |
| creatine                                                         | 1.00                                              | 1.02        | 0.56        |                   |
| creatinine                                                       | 1.00                                              | 0.89        | 0.37        |                   |
| 2-aminobutyrate                                                  | 1.00                                              | 0.97        | 0.84        |                   |
| 5-methylthioadenosine (MTA)                                      | 1.00                                              | 1.03        | 0.50        |                   |
| putrescine                                                       | 1.00                                              | 0.93        | 0.57        |                   |
| spermidine                                                       | 1.00                                              | 0.88        | 0.22        |                   |
| spermine                                                         | 1.00                                              | 0.65        | 0.23        |                   |
| 4-guandinobutanoate                                              | 1.00                                              | 1.13        | 0.13        |                   |
| <b>glutathione, reduced (GSH)</b>                                | 1.00                                              | 0.54        | <b>0.03</b> |                   |
| 5-oxoproline                                                     | 1.00                                              | 1.00        | 0.91        |                   |
| glutathione, oxidized (GSSG)                                     | 1.00                                              | 0.66        | 0.30        |                   |
| cysteine-glutathione disulfide                                   | 1.00                                              | 0.82        | 0.20        |                   |
| camosine                                                         | 1.00                                              | 1.07        | 0.55        |                   |
| homocarnosine                                                    | 1.00                                              | 0.86        | 0.14        |                   |
| <b>gamma-glutamylleucine</b>                                     | 1.00                                              | 1.20        | <b>0.02</b> |                   |
| <b>gamma-glutamylglutamate</b>                                   | 1.00                                              | 0.77        | <b>0.04</b> |                   |
| <b>gamma-glutamylglutamine</b>                                   | 1.00                                              | 0.80        | <b>0.01</b> |                   |
| gamma-glutamylphenylalanine                                      | 1.00                                              | 1.03        | 0.94        |                   |
| N-acetylglucosamine                                              | 1.00                                              | 0.98        | 0.80        |                   |
| <b>erythronate*</b>                                              | 1.00                                              | 1.15        | <b>0.04</b> |                   |
| N-acetylneuraminic acid                                          | 1.00                                              | 0.98        | 0.39        |                   |
| fructose                                                         | 1.00                                              | 0.94        | 0.68        |                   |
| mannose                                                          | 1.00                                              | 1.85        | 0.06        |                   |
| mannose-6-phosphate                                              | 1.00                                              | 1.07        | 0.49        |                   |
| sorbitol                                                         | 1.00                                              | 0.78        | 0.44        |                   |
| 1,5-anhydroglucitol (1,5-AG)                                     | 1.00                                              | 1.10        | 0.83        |                   |
| glycerate                                                        | 1.00                                              | 0.92        | 0.34        |                   |
| glucose-6-phosphate (G6P)                                        | 1.00                                              | 1.17        | 0.12        |                   |
| <b>glucose</b>                                                   | 1.00                                              | 1.83        | <b>0.00</b> |                   |
| Fructose-6-phosphate                                             | 1.00                                              | 1.14        | 0.48        |                   |
| <b>Isobar: fructose 1,6-diphosphate, glucose 1,6-diphosphate</b> | 1.00                                              | 1.26        | <b>0.04</b> |                   |
| <b>3-phosphoglycerate</b>                                        | 1.00                                              | 0.70        | <b>0.02</b> |                   |
| dihydroxyacetone phosphate (DHAP)                                | 1.00                                              | 1.11        | 0.32        |                   |
| 1,3-dihydroxyacetone                                             | 1.00                                              | 1.21        | 0.71        |                   |
| pyruvate                                                         | 1.00                                              | 0.92        | 0.51        |                   |
| lactate                                                          | 1.00                                              | 0.99        | 0.88        |                   |
| arabitol                                                         | 1.00                                              | 1.16        | 0.50        |                   |
| ribitol                                                          | 1.00                                              | 1.00        | 0.93        |                   |
| sedoheptulose-7-phosphate                                        | 1.00                                              | 1.43        | 0.12        |                   |
| <b>ribose 5-phosphate</b>                                        | 1.00                                              | 0.86        | <b>0.05</b> |                   |
| Isobar: ribulose 5-phosphate, xylulose 5-phosphate               | 1.00                                              | 1.02        | 0.93        |                   |
| arabinose                                                        | 1.00                                              | 1.32        | 0.15        |                   |
| citrate                                                          | 1.00                                              | 0.97        | 0.72        |                   |
| alpha-ketoglutarate                                              | 1.00                                              | 0.71        | 0.18        |                   |
| succinate                                                        | 1.00                                              | 1.19        | 0.60        |                   |
| fumarate                                                         | 1.00                                              | 1.16        | 0.15        |                   |
| malate                                                           | 1.00                                              | 0.98        | 0.81        |                   |
| phosphate                                                        | 1.00                                              | 0.96        | 0.14        |                   |
| pyrophosphate (PPi)                                              | 1.00                                              | 1.29        | 0.78        |                   |
| Energy                                                           | <b>linoleate (18:2n6)</b>                         | 1.00        | 1.60        | <b>&lt; 0.001</b> |
|                                                                  | <b>linolenate [alpha or gamma; (18:3n3 or 6)]</b> | 1.00        | 1.40        | <b>0.01</b>       |
|                                                                  | <b>dihomo-linolenate (20:3n3 or n6)</b>           | 1.00        | 1.49        | <b>0.00</b>       |
|                                                                  | <b>eicosapentaenoate (EPA; 20:5n3)</b>            | 1.00        | 1.20        | 0.11              |
|                                                                  | <b>docosapentaenoate (n3 DPA; 22:5n3)</b>         | 1.00        | 1.97        | <b>&lt; 0.001</b> |
|                                                                  | docosapentaenoate (n6 DPA; 22:5n6)                | 1.00        | 0.93        | 0.46              |
|                                                                  | <b>docosahexaenoate (DHA; 22:6n3)</b>             | 1.00        | 1.39        | <b>0.01</b>       |
|                                                                  | caproate (6:0)                                    | 1.00        | 0.91        | 0.41              |
|                                                                  | caprylate (8:0)                                   | 1.00        | 0.87        | 0.20              |
|                                                                  | pelargonate (9:0)                                 | 1.00        | 1.02        | 0.61              |
|                                                                  | laurate (12:0)                                    | 1.00        | 1.09        | 0.24              |
|                                                                  | <b>myristate (14:0)</b>                           | 1.00        | 1.30        | <b>0.01</b>       |
|                                                                  | myristoleate (14:1n5)                             | 1.00        | 1.29        | 0.07              |

|  |                                                  |      |      |                   |
|--|--------------------------------------------------|------|------|-------------------|
|  | <b>palmitate (16:0)</b>                          | 1.00 | 1.28 | <b>0.01</b>       |
|  | <b>palmitoleate (16:1n7)</b>                     | 1.00 | 1.76 | <b>&lt; 0.001</b> |
|  | <b>margarate (17:0)</b>                          | 1.00 | 1.32 | <b>0.00</b>       |
|  | <b>10-heptadecanoate (17:1n7)</b>                | 1.00 | 1.36 | <b>0.00</b>       |
|  | stearate (18:0)                                  | 1.00 | 1.13 | 0.11              |
|  | <b>oleate (18:1n9)</b>                           | 1.00 | 1.27 | <b>0.02</b>       |
|  | 10-nonadecanoate (19:1n9)                        | 1.00 | 1.13 | 0.32              |
|  | eicosenoate (20:1n9 or 11)                       | 1.00 | 1.09 | 0.51              |
|  | dihomo-linoleate (20:2n6)                        | 1.00 | 1.25 | 0.07              |
|  | <b>arachidonate (20:4n6)</b>                     | 1.00 | 1.23 | <b>0.00</b>       |
|  | <b>docosadecanoate (22:2n6)</b>                  | 1.00 | 1.35 | <b>0.04</b>       |
|  | adrenate (22:4n6)                                | 1.00 | 1.12 | 0.45              |
|  | <b>n-Butyl Oleate</b>                            | 1.00 | 0.83 | <b>0.01</b>       |
|  | 2-hydroxyglutarate                               | 1.00 | 0.97 | 0.60              |
|  | oleamide                                         | 1.00 | 1.43 | 0.93              |
|  | stearamide                                       | 1.00 | 1.34 | 0.65              |
|  | prostaglandin D2                                 | 1.00 | 0.89 | 0.21              |
|  | prostaglandin E2                                 | 1.00 | 0.98 | 0.81              |
|  | <b>5-HETE</b>                                    | 1.00 | 1.42 | <b>0.03</b>       |
|  | 15-HETE                                          | 1.00 | 1.25 | 0.20              |
|  | palmitoyl ethanolamide                           | 1.00 | 1.00 | 0.93              |
|  | propionylcarnitine                               | 1.00 | 1.10 | 0.28              |
|  | carnitine                                        | 1.00 | 0.96 | 0.45              |
|  | 3-dehydrocarnitine*                              | 1.00 | 1.03 | 0.86              |
|  | acetyl carnitine                                 | 1.00 | 1.00 | 0.98              |
|  | <b>oleoylcarnitine</b>                           | 1.00 | 2.91 | <b>0.01</b>       |
|  | 1-octadecanol                                    | 1.00 | 0.94 | 0.30              |
|  | <b>choline phosphate</b>                         | 1.00 | 0.93 | <b>0.03</b>       |
|  | ethanolamine                                     | 1.00 | 1.00 | 0.87              |
|  | phosphoethanolamine                              | 1.00 | 0.91 | 0.35              |
|  | glycerol                                         | 1.00 | 1.01 | 0.74              |
|  | glycerol 3-phosphate (G3P)                       | 1.00 | 0.99 | 0.94              |
|  | glycerophosphorylcholine (GPC)                   | 1.00 | 0.94 | 0.62              |
|  | <b>cytidine 5'-diphosphocholine</b>              | 1.00 | 0.77 | <b>0.01</b>       |
|  | myo-inositol                                     | 1.00 | 1.14 | 0.12              |
|  | chiro-inositol                                   | 1.00 | 1.57 | 0.20              |
|  | inositol 1-phosphate (I1P)                       | 1.00 | 0.93 | 0.65              |
|  | scyllo-inositol                                  | 1.00 | 1.15 | 0.23              |
|  | <b>3-hydroxybutyrate (BHBA)</b>                  | 1.00 | 1.59 | <b>0.01</b>       |
|  | <b>1-palmitoylglycerophosphoethanolamine</b>     | 1.00 | 2.13 | <b>0.01</b>       |
|  | 2-palmitoylglycerophosphoethanolamine*           | 1.00 | 2.90 | 0.08              |
|  | 1-stearoylglycerophosphoethanolamine             | 1.00 | 1.88 | 0.12              |
|  | <b>1-oleoylglycerophosphoethanolamine</b>        | 1.00 | 2.35 | <b>0.02</b>       |
|  | 2-oleoylglycerophosphoethanolamine*              | 1.00 | 1.65 | 0.10              |
|  | <b>1-arachidonoylglycerophosphoethanolamine*</b> | 1.00 | 1.58 | <b>0.04</b>       |
|  | 2-arachidonoylglycerophosphoethanolamine*        | 1.00 | 3.25 | 0.11              |
|  | 2-docosahexaenoylglycerophosphoethanolamine*     | 1.00 | 3.12 | 0.09              |
|  | <b>1-palmitoylglycerophosphocholine</b>          | 1.00 | 4.78 | <b>0.05</b>       |
|  | <b>2-palmitoylglycerophosphocholine*</b>         | 1.00 | 5.19 | <b>0.03</b>       |
|  | <b>1-stearoylglycerophosphocholine</b>           | 1.00 | 4.04 | <b>0.04</b>       |
|  | 2-stearoylglycerophosphocholine*                 | 1.00 | 1.58 | 0.29              |
|  | <b>1-oleoylglycerophosphocholine</b>             | 1.00 | 5.04 | <b>0.02</b>       |
|  | <b>2-oleoylglycerophosphocholine*</b>            | 1.00 | 3.62 | <b>0.04</b>       |
|  | 1-arachidonoylglycerophosphocholine*             | 1.00 | 1.59 | 0.20              |
|  | <b>2-arachidonoylglycerophosphocholine*</b>      | 1.00 | 3.18 | <b>0.05</b>       |
|  | 1-docosahexaenoylglycerophosphocholine*          | 1.00 | 1.95 | 0.41              |
|  | 2-docosahexaenoylglycerophosphocholine*          | 1.00 | 2.97 | 0.09              |
|  | <b>1-palmitoylglycerophosphoinositol*</b>        | 1.00 | 1.55 | <b>0.02</b>       |
|  | 1-stearoylglycerophosphoinositol*                | 1.00 | 1.16 | 0.27              |
|  | 1-arachidonoylglycerophosphoinositol*            | 1.00 | 1.04 | 0.87              |
|  | <b>1-oleoylglycerophosphoserine</b>              | 1.00 | 1.41 | <b>0.01</b>       |
|  | <b>2-oleoylglycerophosphoserine*</b>             | 1.00 | 1.94 | <b>0.02</b>       |
|  | <b>1-palmitoylglycerophosphoethanolamine*</b>    | 1.00 | 2.15 | <b>0.03</b>       |
|  | 1-palmitoylglycerol (1-monopalmitin)             | 1.00 | 1.22 | 0.13              |
|  | 1-stearoylglycerol (1-monostearin)               | 1.00 | 1.06 | 0.82              |
|  | 2-stearoylglycerol (2-monostearin)               | 1.00 | 1.02 | 0.83              |
|  | 1-oleoylglycerol (1-monolein)                    | 1.00 | 1.41 | 0.12              |
|  | 2-oleoylglycerol (2-monolein)                    | 1.00 | 1.00 | 0.83              |
|  | <b>sphingosine</b>                               | 1.00 | 3.71 | <b>0.02</b>       |
|  | palmitoyl sphingomyelin                          | 1.00 | 1.06 | 0.61              |
|  | stearoyl sphingomyelin                           | 1.00 | 0.87 | 0.15              |
|  | <b>3-hydroxy-5-methylglutarate</b>               | 1.00 | 0.35 | <b>&lt; 0.001</b> |
|  | cholesterol                                      | 1.00 | 0.96 | 0.57              |
|  | 7-alpha-hydroxycholesterol                       | 1.00 | 1.11 | 0.47              |
|  | 7-beta-hydroxycholesterol                        | 1.00 | 1.11 | 0.41              |
|  | 24(S)-hydroxycholesterol                         | 1.00 | 0.94 | 0.70              |
|  | <b>corticosterone</b>                            | 1.00 | 0.58 | <b>0.02</b>       |
|  | xanthine                                         | 1.00 | 1.03 | 0.49              |
|  | hypoxanthine                                     | 1.00 | 1.03 | 0.38              |
|  | inosine                                          | 1.00 | 0.97 | 0.42              |
|  | adenine                                          | 1.00 | 0.92 | 0.22              |
|  | adenosine                                        | 1.00 | 1.01 | 0.96              |
|  | N1-methyladenosine                               | 1.00 | 0.98 | 0.93              |
|  | adenosine 2'-monophosphate (2'-AMP)              | 1.00 | 1.00 |                   |
|  | adenosine 5'-monophosphate (AMP)                 | 1.00 | 0.97 | 0.67              |
|  | <b>guanosine</b>                                 | 1.00 | 0.85 | <b>0.05</b>       |
|  | urate                                            | 1.00 | 1.14 | 0.11              |
|  | allantoin                                        | 1.00 | 1.04 | 0.72              |
|  | cytidine                                         | 1.00 | 0.97 | 0.49              |
|  | <b>cytidine 5'-monophosphate (5'-CMP)</b>        | 1.00 | 0.86 | <b>0.01</b>       |
|  | orotate                                          | 1.00 | 1.09 | 0.70              |
|  | <b>uracil</b>                                    | 1.00 | 1.17 | <b>0.01</b>       |
|  | uridine                                          | 1.00 | 1.05 | 0.13              |
|  | pseudouridine                                    | 1.00 | 1.12 | 0.11              |
|  | methylphosphate                                  | 1.00 | 1.06 | 0.36              |
|  | ascorbate (Vitamin C)                            | 1.00 | 0.95 | 0.80              |
|  | dehydroascorbate                                 | 1.00 | 0.88 | 0.66              |
|  | threonate                                        | 1.00 | 1.12 | 0.60              |
|  | themi*                                           | 1.00 | 1.63 | 0.11              |
|  | nicotinamide                                     | 1.00 | 0.96 | 0.51              |
|  | nicotinamide adenine dinucleotide (NAD+)         | 1.00 | 0.94 | 0.40              |
|  | pantothenate                                     | 1.00 | 1.05 | 0.63              |
|  | phosphopantetheine                               | 1.00 | 0.76 | 0.08              |
|  | pyridoxal                                        | 1.00 | 1.05 | 0.77              |
|  | flavin adenine dinucleotide (FAD)                | 1.00 | 1.05 | 0.26              |
|  | riboflavin (Vitamin B2)                          | 1.00 | 1.00 | 1.00              |
|  | flavin mononucleotide (FMN)                      | 1.00 | 0.93 | 0.11              |
|  | alpha-tocopherol                                 | 1.00 | 0.86 | 0.55              |
|  | glycolate (hydroxyacetate)                       | 1.00 | 1.06 | 0.62              |
|  | glycerol 2-phosphate                             | 1.00 | 1.05 | 0.56              |
|  | 2-phenoxyethanol                                 | 1.00 | 0.84 | 0.18              |
|  | 2-pyrroldinone                                   | 1.00 | 1.18 | 0.96              |
|  | ergothioneine                                    | 1.00 | 1.08 | 0.48              |
|  | erythritol                                       | 1.00 | 1.03 | 0.81              |
